# Supplementary material for: Sesquiterpenes from Artemisia annua and Their Cytotoxic Activities
Source: MDPI journal article supplement (doi:10.3390/molecules27165079), 2022-08-10

## Sesquiterpenes from *Artemisia annua* and their cytotoxic activities

Xiao Han <sup>1</sup>, Yao Chai <sup>2</sup>, Cheng Lv <sup>1</sup>, Qianqian Chen <sup>1</sup>, Jingling Liu <sup>1</sup>, Yongli Wang <sup>1,3,\*</sup> and Guixin Chou <sup>1,3,\*</sup>

### Affiliations

<sup>1</sup>The MOE Key Laboratory of Standardization of Chinese Medicines and SATCM Key Laboratory of New Resources and Quality Evaluation of Chinese Medicines, Institute of Chinese Materia Medica (ICMM), Shanghai University of Traditional Chinese Medicine (SHUTCM), China.

<sup>2</sup> Shanghai University (SHU), Shanghai, China.

<sup>3</sup>Shanghai R&D Center for Standardization of Chinese Medicines, Shanghai 201203, PR China

### Correspondence

Prof. Guixin Chou Institute of Chinese Materia Medica  
Shanghai University of Traditional Chinese Medicine (SHUTCM)  
1200 Cai Lun Road, Pudong New Area, Shanghai, China.  
chouguixin@shutcm.edu.cn

Mrs. Yongli Wang  
Institute of Chinese Materia Medica  
Shanghai University of Traditional Chinese Medicine (SHUTCM)  
1200 Cai Lun Road, Pudong New Area, Shanghai, China.  
ylwang521@126.com

## Contents

**Figure S1.** The HRESIMS spectrum of compound **1**.

**Figure S2.** The  $^1\text{H}$  NMR spectrum of compound **1** (MeOD, 400 MHz).

**Figure S3.** The  $^{13}\text{C}$  NMR spectrum of compound **1** (MeOD, 100 MHz).

**Figure S4.** The HSQC spectrum of compound **1** (MeOD, 400 MHz).

**Figure S5.** The HMBC spectrum of compound **1** (MeOD, 400 MHz).

**Figure S6.** The COSY spectrum of compound **1** (MeOD, 400 MHz).

**Figure S7.** The NOESY spectrum of compound **1** (MeOD, 400 MHz).

**Figure S8.** The HRESIMS spectrum of compound **2**

**Figure S9.** The  $^1\text{H}$  NMR spectrum of compound **2** (MeOD, 400 MHz).

**Figure S10.** The  $^{13}\text{C}$  NMR spectrum of compound **2** (MeOD, 100 MHz).

**Figure S11.** The HSQC spectrum of compound **2** (MeOD, 400 MHz).

**Figure S12.** The HMBC spectrum of compound **2** (MeOD, 400 MHz).

**Figure S13.** The COSY spectrum of compound **2** (MeOD, 400 MHz).

**Figure S14.** The NOESY spectrum of compound **2** (MeOD, 400 MHz).

**Figure S15.** X-ray crystallographic structure of compound **3**

**Figure S16.** Results for DP4+ analysis of compound **1** with  $^{13}\text{C}$  NMR chemical shifts calculated at mPW1PW91/6-31G (d, p) level, (isomer 1 =  $6S^*$ , isomer 2 =  $6R^*$ ).

**Figure S17.** Correlation coefficients and DP4+ analysis between experimental and calculated  $^{13}\text{C}$  NMR chemical shifts of isomer 1 =  $6S^*$  and isomer 2 =  $6R^*$

**Figure S18.** Results for DP4+ analysis of compound **2** with  $^{13}\text{C}$  NMR chemical shifts calculated at mPW1PW91/6-31G (d, p) level, (isomer 1 =  $6R^*$ ,  $7R^*$ , isomer 2 =  $6R^*$ ,  $7S^*$ , isomer 3 =  $6S^*$ ,  $7R^*$ , isomer 4 =  $6S^*$ ,  $7S^*$ ).

**Figure S19.** Correlation coefficients and DP4+ analysis between experimental and calculated  $^{13}\text{C}$  NMR chemical shifts of isomer 1 =  $6R^*$ ,  $7R^*$ , isomer 2 =  $6R^*$ ,  $7S^*$ , isomer 3 =  $6S^*$ ,  $7R^*$ , and isomer 4 =  $6S^*$ ,  $7S^*$ .

**Figure S1.** The HRESIMS spectrum of compound **1**.

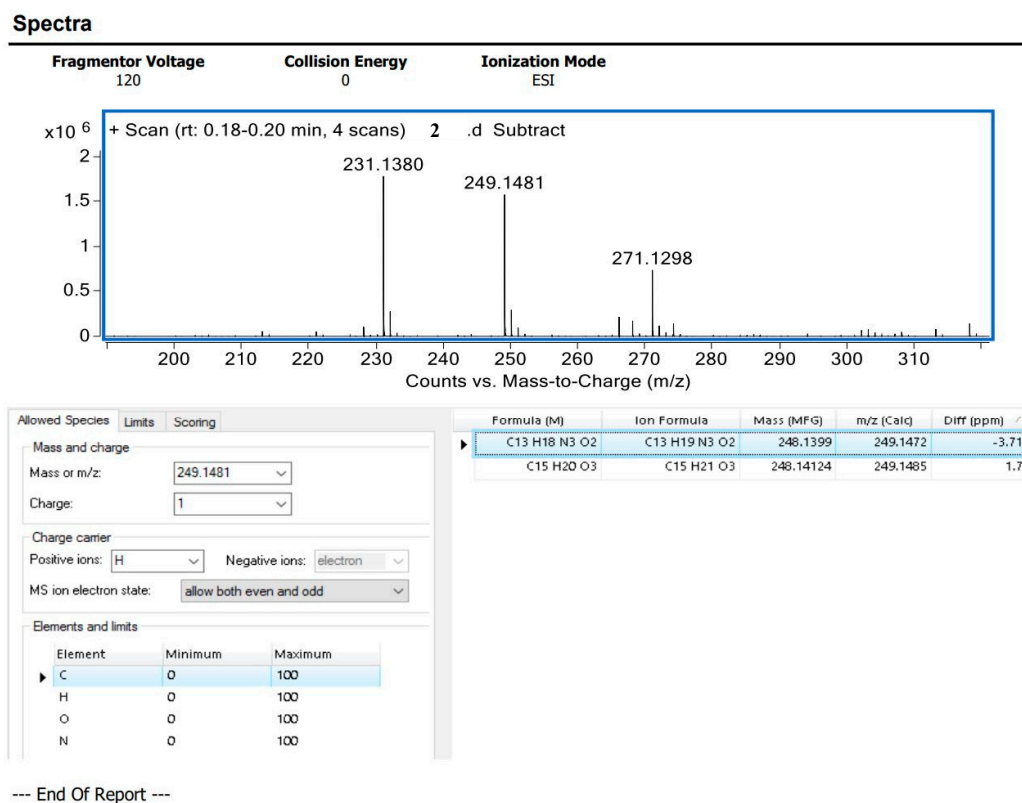

**Figure S2.** The  $^1\text{H}$  NMR spectrum of compound **1** (MeOD, 400 MHz).

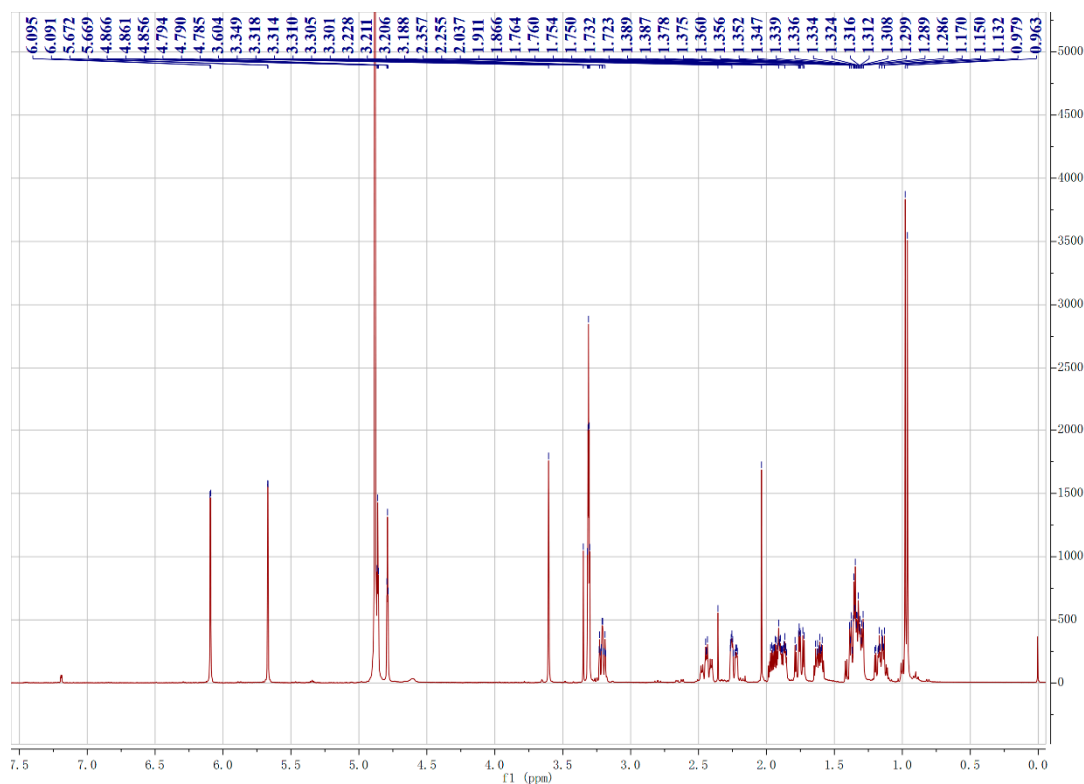

**Figure S3.** The  $^{13}\text{C}$  NMR spectrum of compound **1** (MeOD, 100 MHz).

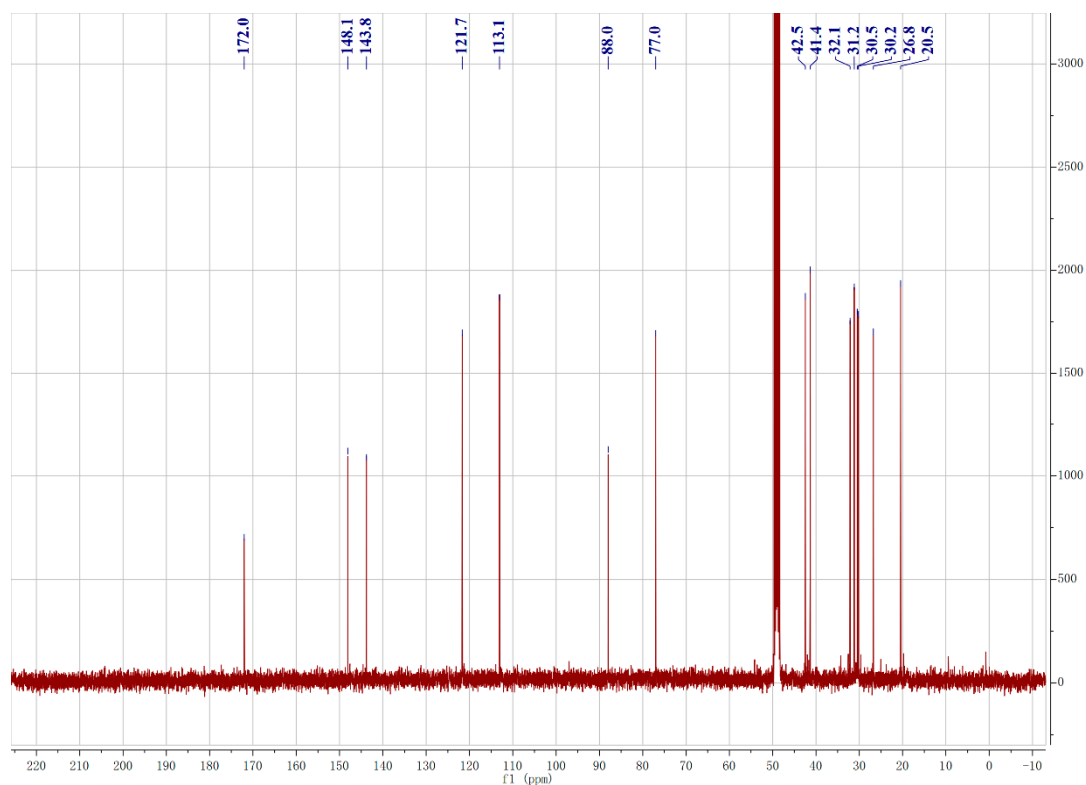

**Figure S4.** The HSQC spectrum of compound **1** (MeOD, 400 MHz).

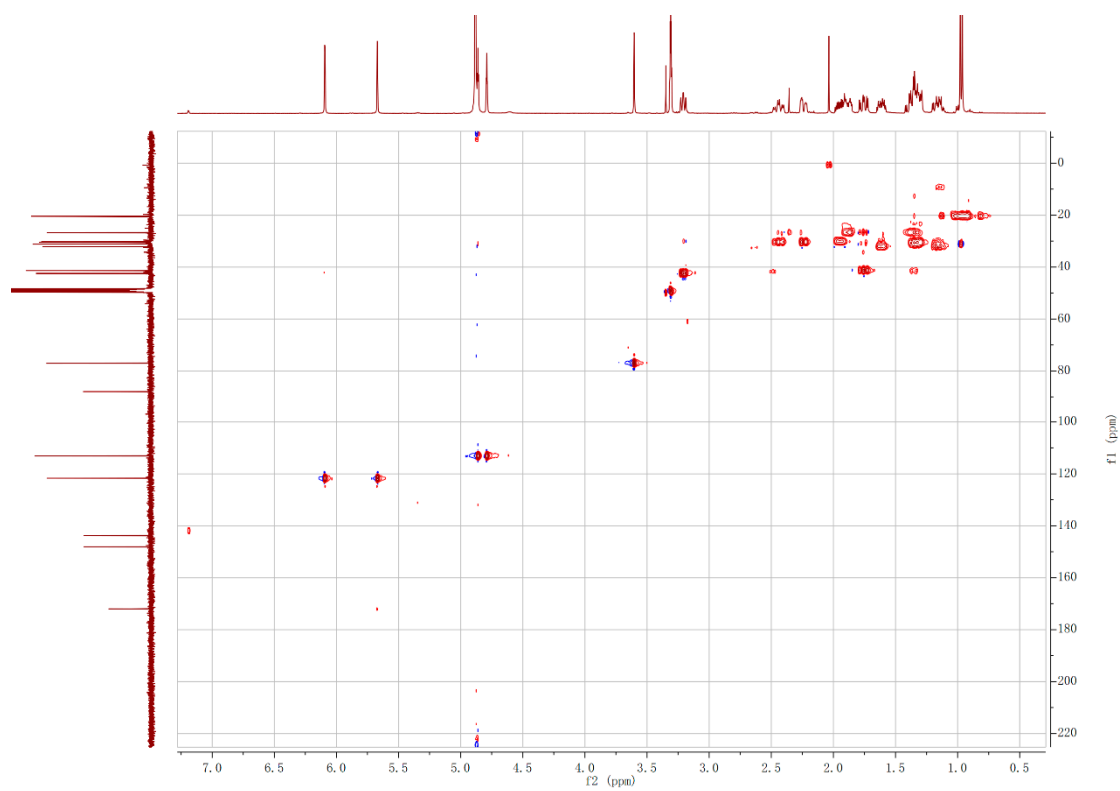

**Figure S5.** The HMBC spectrum of compound **1** (MeOD, 400 MHz).

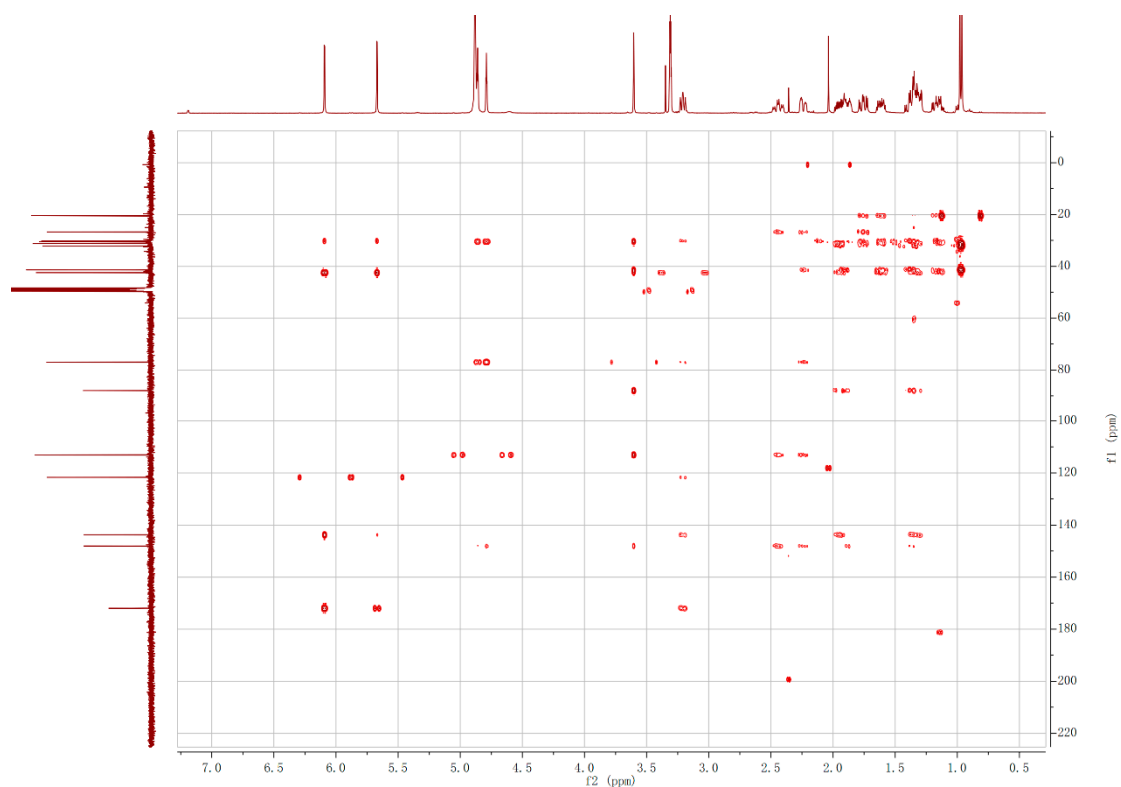

**Figure S6.** The COSY spectrum of compound **1** (MeOD, 400 MHz).

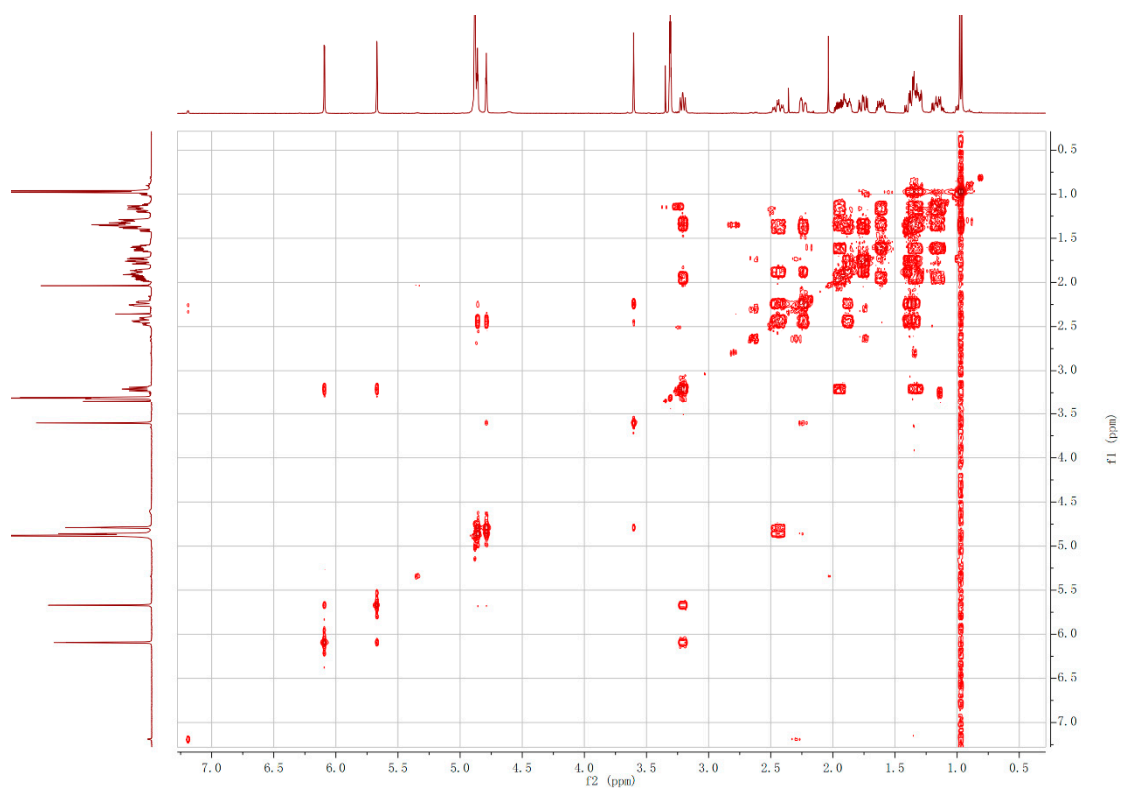

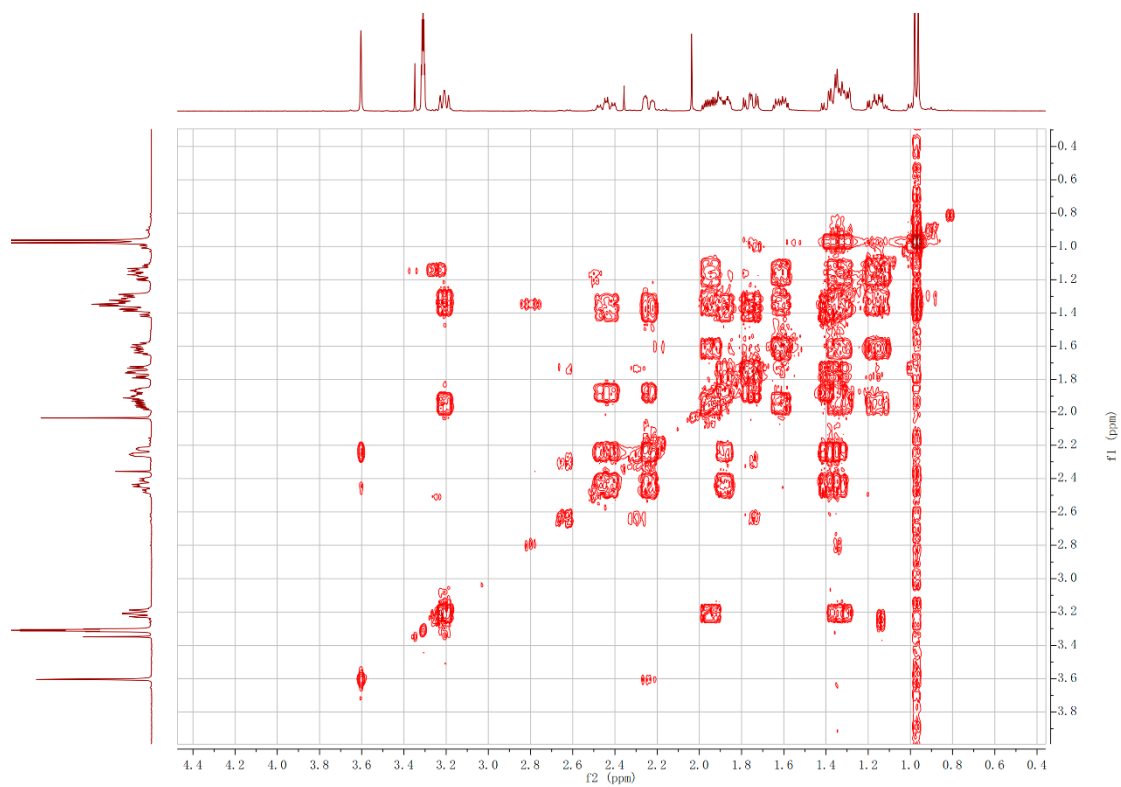

**Figure S7.** The NOESY spectrum of compound **1** (MeOD, 400 MHz).

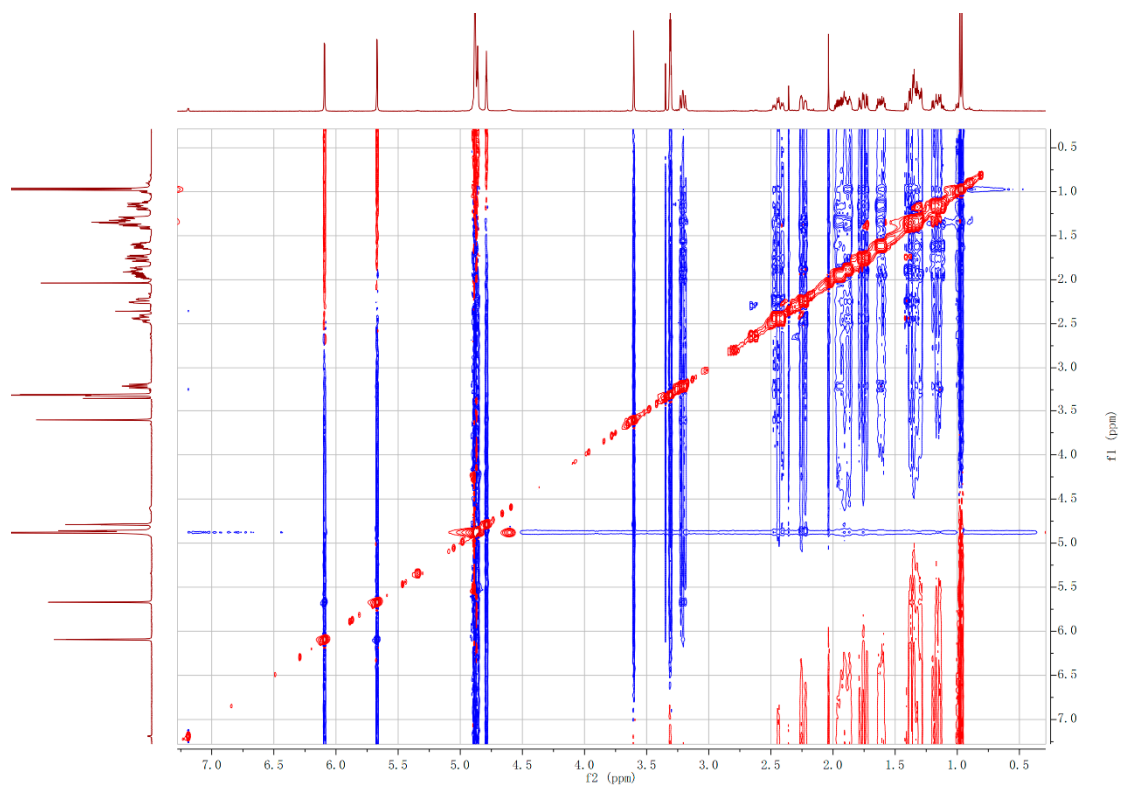



**Figure S9.** The  $^1\text{H}$  NMR spectrum of compound **2** (MeOD, 400 MHz).

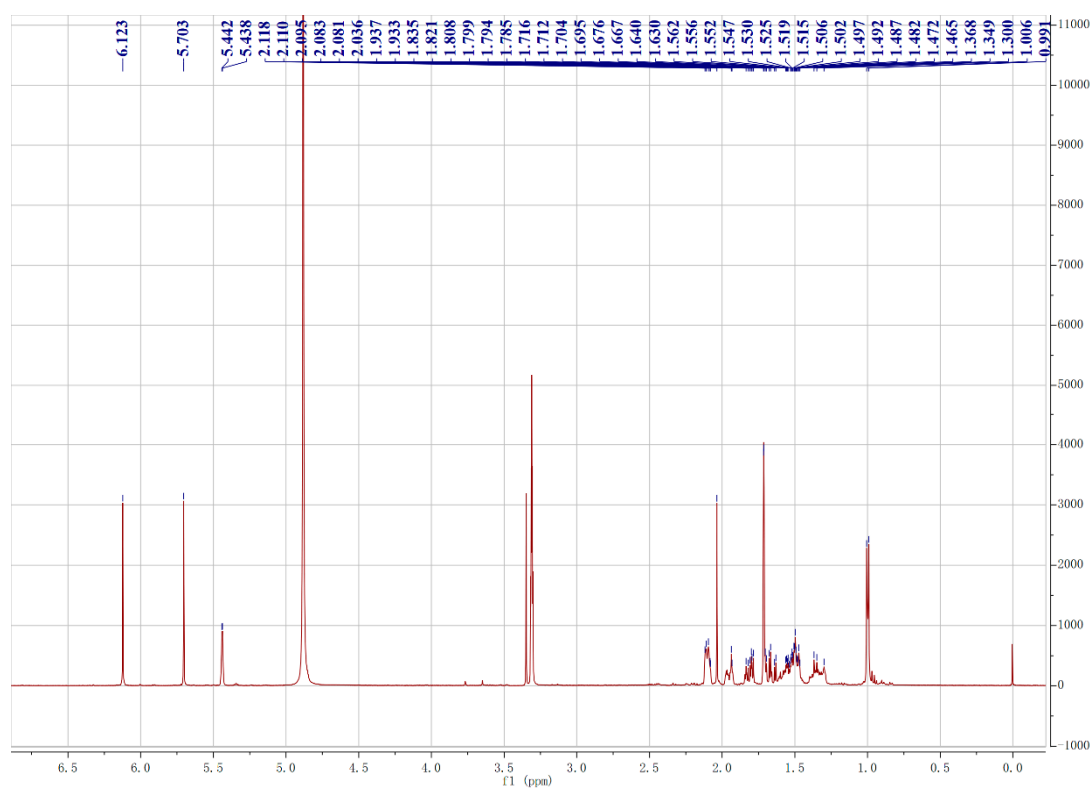

**Figure S10.** The  $^{13}\text{C}$  NMR spectrum of compound **2** (MeOD, 100 MHz).

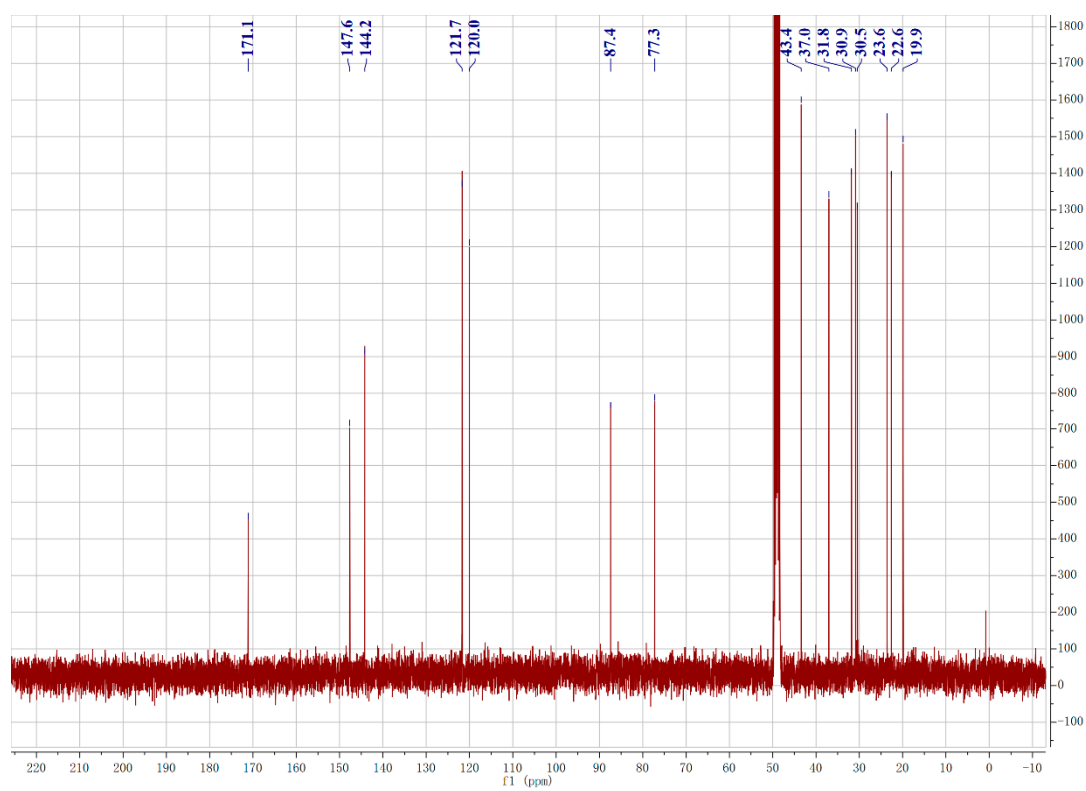



**Figure S11.** The HSQC spectrum of compound **2** (MeOD, 400 MHz).

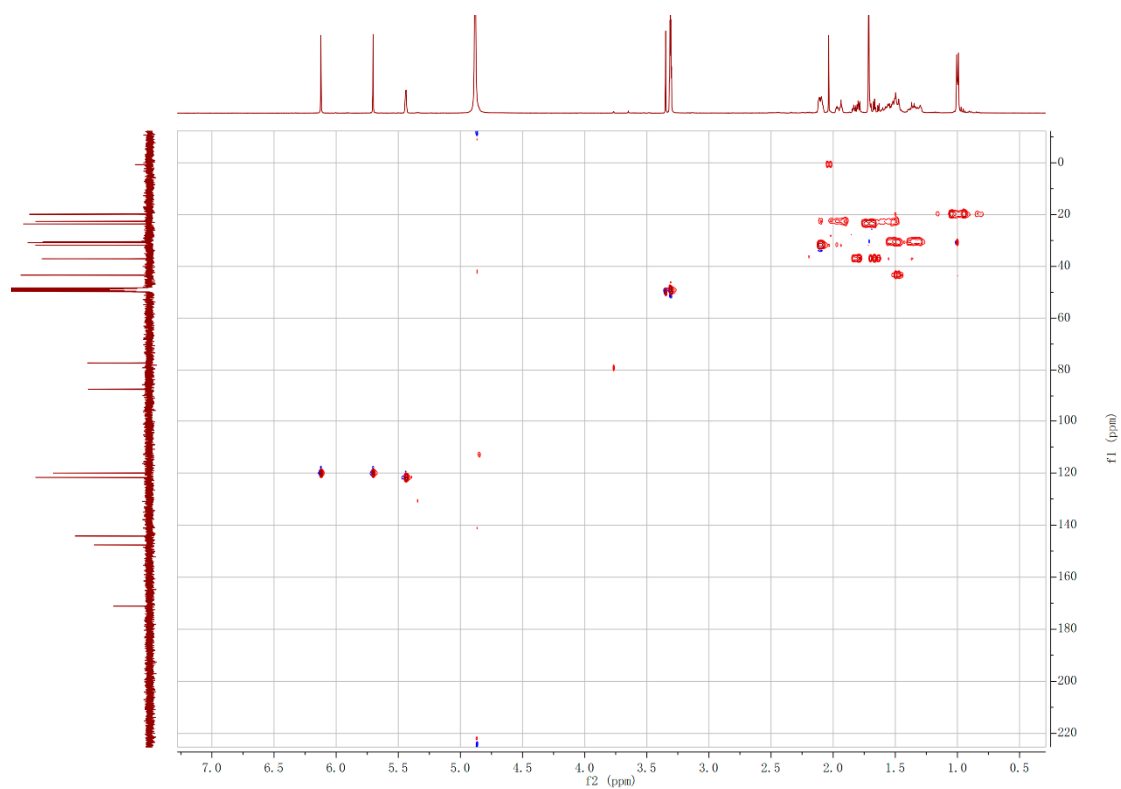

**Figure S12.** The HMBC spectrum of compound **2** (MeOD, 400 MHz).

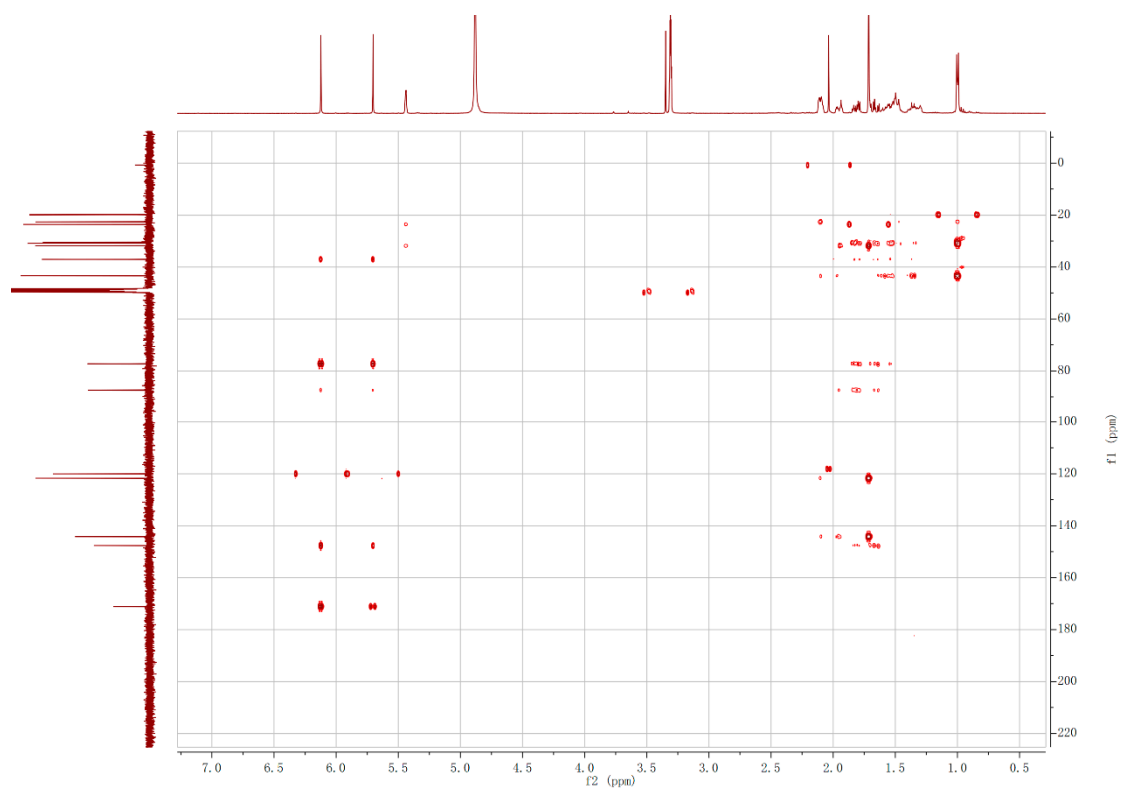

**Figure S13.** The COSY spectrum of compound **2** (MeOD, 400 MHz).

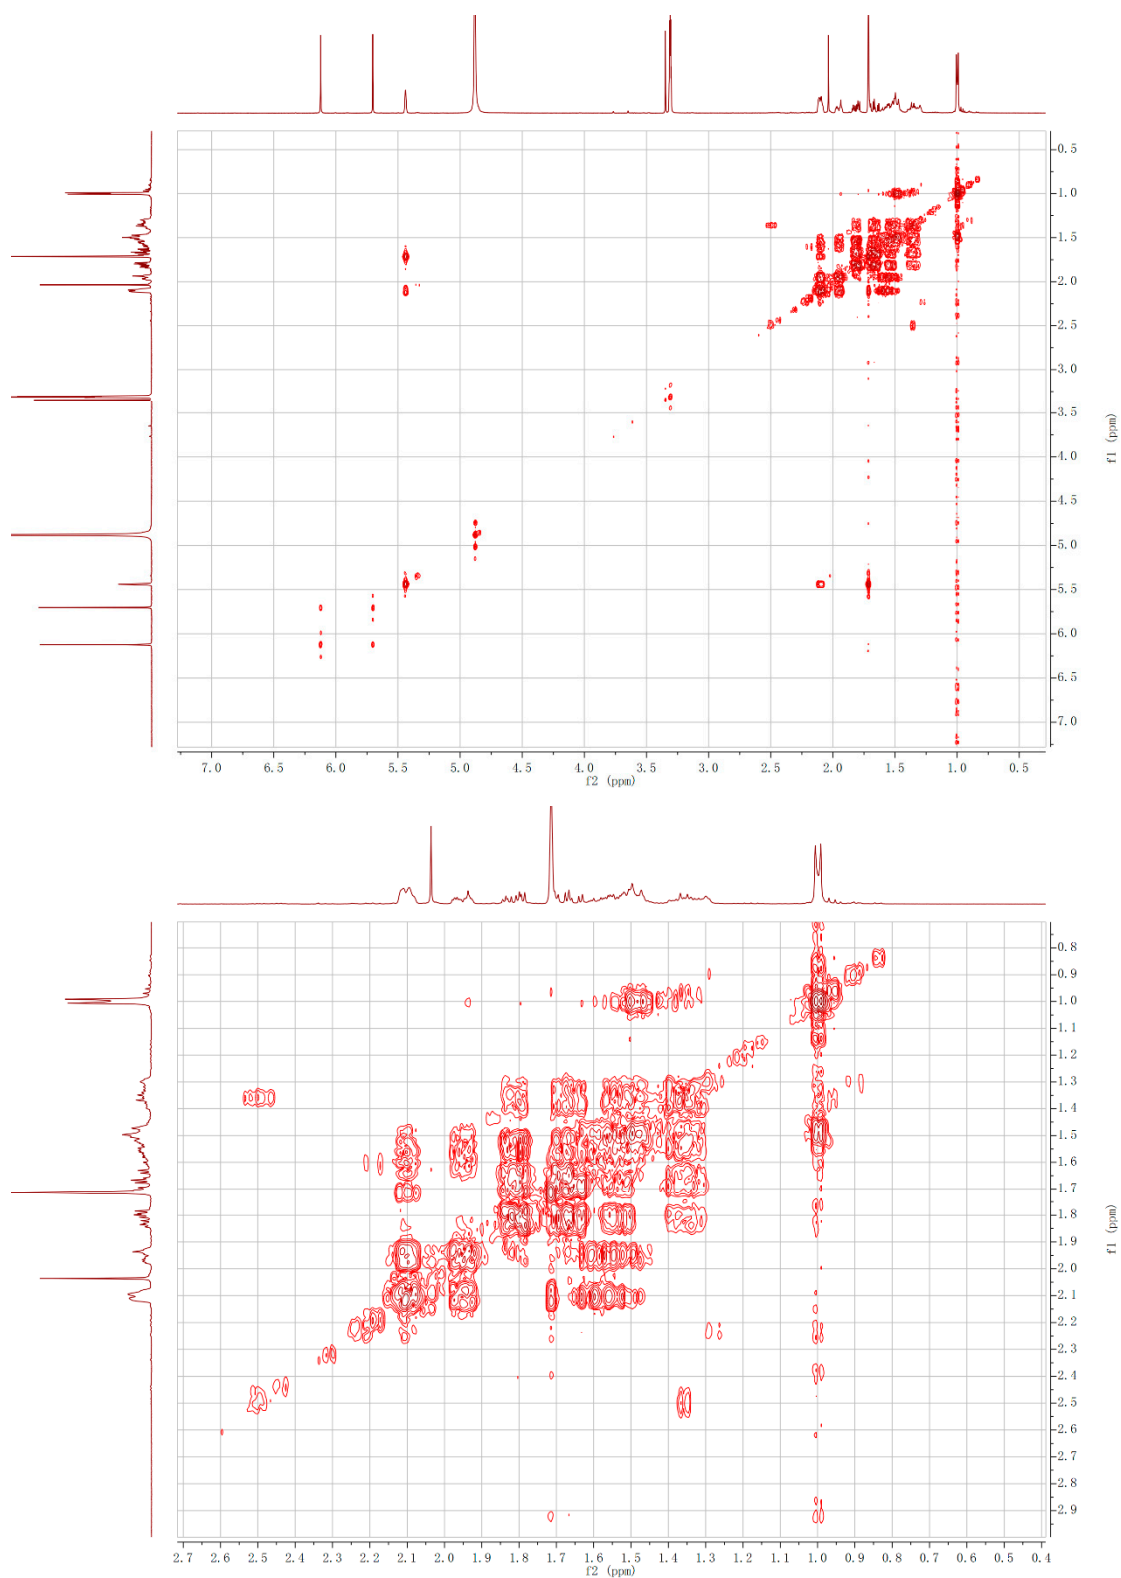

**Figure S14.** The NOESY spectrum of compound **2** (MeOD, 400 MHz).

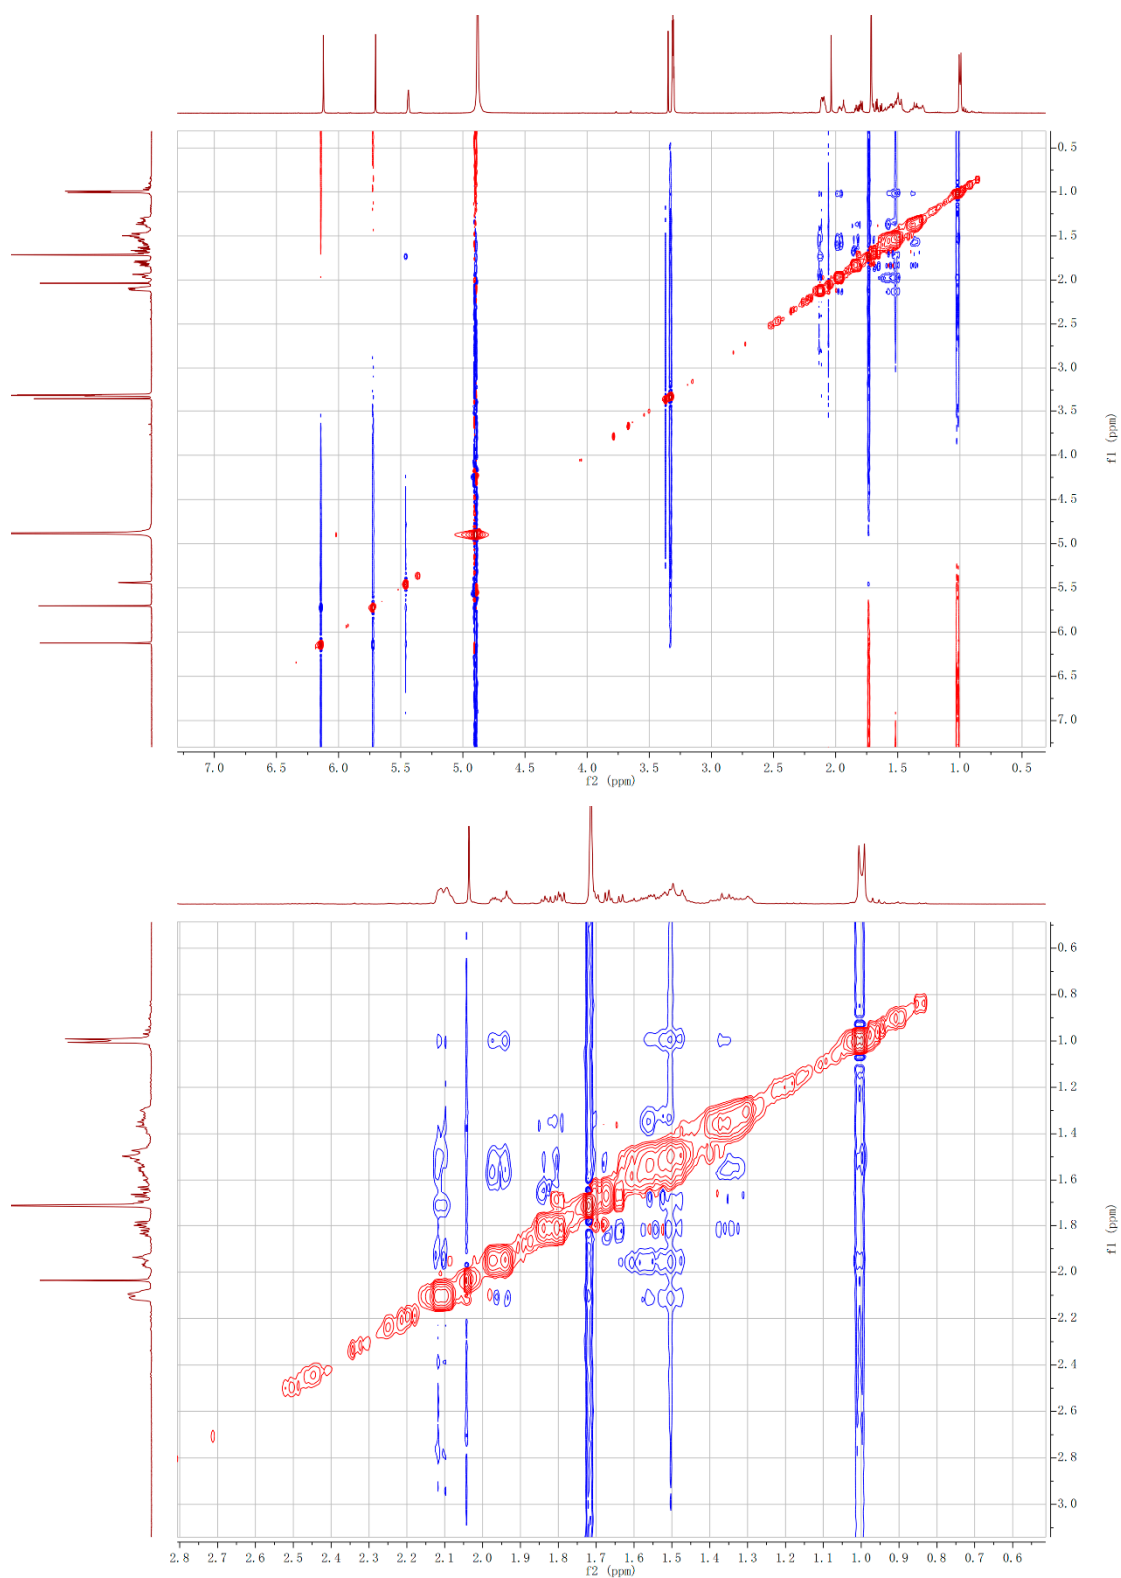

**Figure S15.** X-ray crystallographic structure of compound **3**

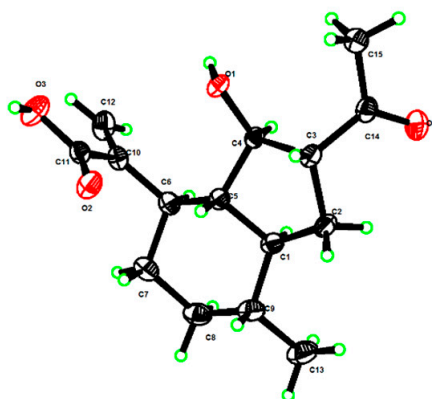

**Figure S16.** Results for DP4+ analysis of compound **1** with  $^{13}\text{C}$  NMR chemical shifts calculated at mPW1PW91/6-31G (d, p) level, (isomer 1 =  $6S^*$ , isomer 2 =  $6R^*$ ).

| Isomer N° |      |          | 1          | 2          | 3 | 4 |
|-----------|------|----------|------------|------------|---|---|
| DP4+ (%)  |      | H data   | -          | -          | - | - |
|           |      | C data   | 99.99%     | 0.01%      | - | - |
|           |      | All data | 99.99%     | 0.01%      | - | - |
| Type      | sp2? | Exp      | 1          | 2          | 3 | 4 |
| C         |      | 41.3     | 40.517775  | 42.0922181 |   |   |
| C         |      | 26.7     | 37.483075  | 27.1599786 |   |   |
| C         |      | 30.4     | 32.945875  | 34.9245684 |   |   |
| C         | x    | 148      | 148.612775 | 150.815731 |   |   |
| C         |      | 76.9     | 81.706175  | 80.5203799 |   |   |
| C         |      | 87.9     | 90.572775  | 88.6752144 |   |   |
| C         |      | 42.4     | 42.839075  | 52.2827631 |   |   |
| C         |      | 30.1     | 34.148375  | 19.1875143 |   |   |
| C         |      | 32.1     | 28.837875  | 35.5407212 |   |   |
| C         |      | 31.1     | 36.907875  | 30.842815  |   |   |
| C         | x    | 143.7    | 142.781275 | 140.999795 |   |   |
| C         | x    | 172      | 168.281275 | 169.404429 |   |   |
| C         | x    | 121.6    | 126.148675 | 115.794454 |   |   |
| C         |      | 20.4     | 25.651475  | 20.4255884 |   |   |
| C         | x    | 113      | 112.306475 | 112.823131 |   |   |

| Default parameters | 1      | 2     | 3 | 4 |
|--------------------|--------|-------|---|---|
| sDP4+ (H data)     | -      | -     | - | - |
| sDP4+ (C data)     | 98.51% | 1.49% | - | - |
| sDP4+ (all data)   | 98.51% | 1.49% | - | - |
| uDP4+ (H data)     | -      | -     | - | - |
| uDP4+ (C data)     | 99.60% | 0.40% | - | - |
| uDP4+ (all data)   | 99.60% | 0.40% | - | - |
| DP4+ (H data)      | -      | -     | - | - |
| DP4+ (C data)      | 99.99% | 0.01% | - | - |
| DP4+ (all data)    | 99.99% | 0.01% | - | - |

| 编号 | 实验    | No | R_opt | No     | S_opt | R校正结果  | R校正误差  | S校正结果 | S校正误差  |        |
|----|-------|----|-------|--------|-------|--------|--------|-------|--------|--------|
| 1  | 41.3  | 1  | 1     | 40.52  | 1     | 42.09  | 37.24  | -4.06 | 41.22  | -0.08  |
| 2  | 26.7  | 2  | 8     | 37.48  | 8     | 27.16  | 34.11  | 7.41  | 26.01  | -0.69  |
| 3  | 30.4  | 3  | 9     | 32.95  | 9     | 34.92  | 29.43  | -0.97 | 33.92  | 3.52   |
| 4  | 148.0 | 4  | 10    | 148.61 | 10    | 150.82 | 148.73 | 0.73  | 151.99 | 3.99   |
| 5  | 76.9  | 5  | 11    | 81.71  | 11    | 80.52  | 79.73  | 2.83  | 80.37  | 3.47   |
| 6  | 87.9  | 6  | 2     | 90.57  | 2     | 88.68  | 88.87  | 0.97  | 88.68  | 0.78   |
| 7  | 42.4  | 7  | 3     | 42.84  | 3     | 52.28  | 39.64  | -2.76 | 51.60  | 9.20   |
| 8  | 30.1  | 8  | 4     | 34.15  | 4     | 19.19  | 30.67  | 0.57  | 17.88  | -12.22 |
| 9  | 32.1  | 9  | 5     | 28.84  | 5     | 35.54  | 25.20  | -6.90 | 34.54  | 2.44   |
| 10 | 31.1  | 10 | 6     | 36.91  | 6     | 30.84  | 33.52  | 2.42  | 29.76  | -1.34  |
| 11 | 143.7 | 11 | 12    | 142.78 | 12    | 141.00 | 142.72 | -0.98 | 141.99 | -1.71  |
| 12 | 172.0 | 12 | 14    | 168.28 | 14    | 169.40 | 169.02 | -2.98 | 170.92 | -1.08  |
| 13 | 121.6 | 13 | 13    | 126.15 | 13    | 115.79 | 125.56 | 3.96  | 116.31 | -5.29  |
| 14 | 20.4  | 14 | 7     | 25.65  | 7     | 20.43  | 21.91  | 1.51  | 19.14  | -1.26  |
| 15 | 113.0 | 15 | 15    | 112.31 | 15    | 112.82 | 111.29 | -1.71 | 113.28 | 0.28   |

**Figure S17.** Correlation coefficients and DP4+ analysis between experimental and calculated  $^{13}\text{C}$  NMR chemical shifts of isomer 1 = 6*S*\* and isomer 2 = 6*R*\*

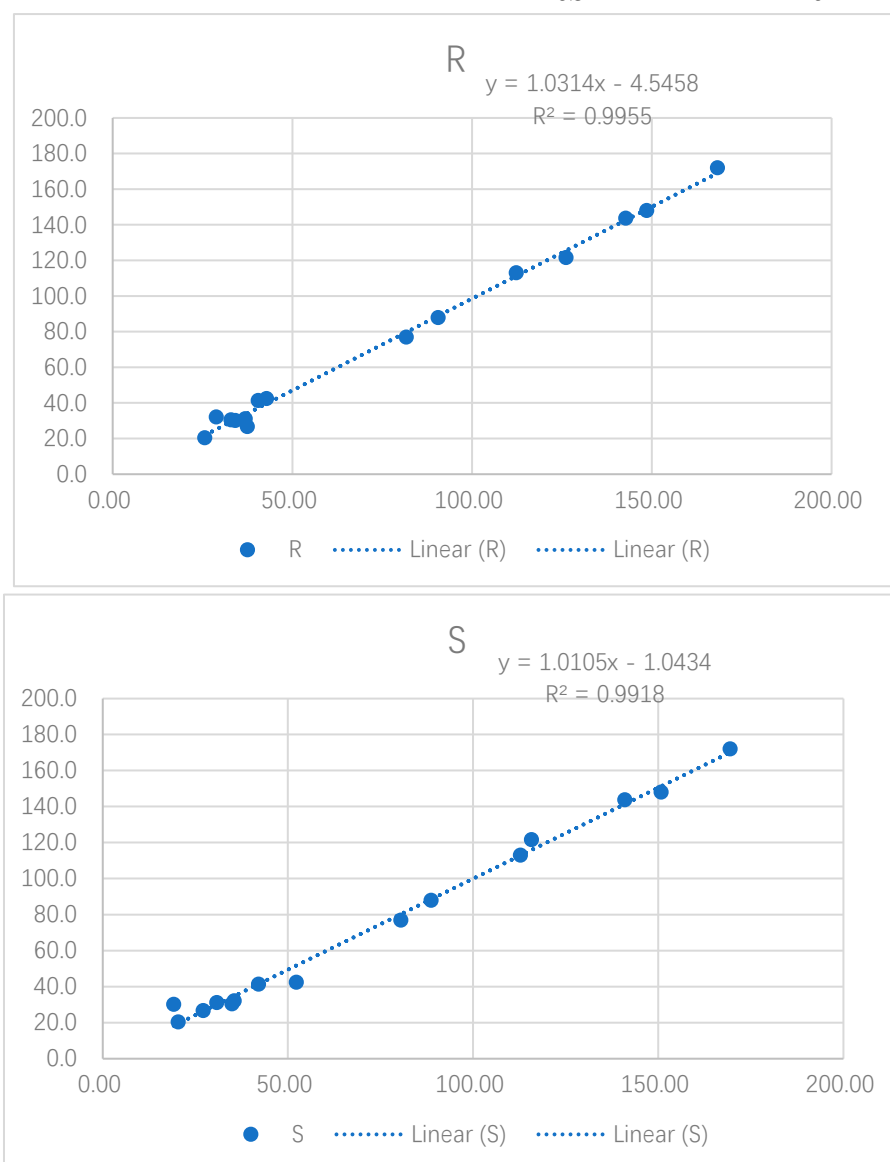

**Figure S18.** Results for DP4+ analysis of compound **2** with  $^{13}\text{C}$  NMR chemical shifts calculated at mPW1PW91/6-31G (d, p) level, (isomer 1 = 6*R*\*, 7*R*\*, isomer 2 = 6*R*\*, 7*S*\*, isomer 3 = 6*S*\*, 7*R*\*, isomer 4 = 6*S*\*, 7*S*\*).

| Isomer N <sup>o</sup> |      |          | 1          | 2          | 3          | 4          |
|-----------------------|------|----------|------------|------------|------------|------------|
| DP4+ (%)              |      | H data   | -          | -          | -          | -          |
|                       |      | C data   | 100.00%    | 0.00%      | 0.00%      | 0.00%      |
|                       |      | All data | 100.00%    | 0.00%      | 0.00%      | 0.00%      |
| Type                  | sp2? | Exp      | 1          | 2          | 3          | 4          |
| C                     |      | 43.4     | 44.930375  | 50.821875  | 40.3192067 | 42.226475  |
| C                     |      | 22.5     | 24.811075  | 22.291575  | 23.3974092 | 31.908875  |
| C                     |      | 31.7     | 34.618975  | 34.991675  | 29.2501822 | 33.957275  |
| C                     | x    | 144.1    | 151.954475 | 145.074275 | 146.018839 | 151.112775 |
| C                     | x    | 121.6    | 117.076275 | 128.129575 | 119.714057 | 118.780775 |
| C                     |      | 87.4     | 86.273875  | 89.347275  | 89.5240063 | 87.884675  |
| C                     |      | 77.2     | 79.498775  | 83.175175  | 80.3456604 | 78.862975  |
| C                     |      | 37       | 37.870475  | 25.620175  | 29.8386493 | 32.746275  |
| C                     |      | 30.4     | 34.087075  | 34.735075  | 31.6646385 | 25.069275  |
| C                     |      | 30.8     | 33.137775  | 32.565675  | 33.6537984 | 37.987275  |
| C                     | x    | 147.6    | 147.011675 | 144.114375 | 143.139361 | 147.360875 |
| C                     | x    | 171      | 167.340975 | 170.557275 | 168.845066 | 167.695275 |
| C                     | x    | 119.9    | 120.144375 | 116.965275 | 123.306905 | 120.865775 |
| C                     |      | 19.8     | 21.112575  | 21.216275  | 21.2257554 | 21.858475  |
| C                     |      | 23.5     | 26.219275  | 25.486375  | 26.0791827 | 25.738375  |

| Default parameters | 1       | 2     | 3     | 4     |
|--------------------|---------|-------|-------|-------|
| sDP4+ (H data)     | -       | -     | -     | -     |
| sDP4+ (C data)     | 100.00% | 0.00% | 0.00% | 0.00% |
| sDP4+ (all data)   | 100.00% | 0.00% | 0.00% | 0.00% |
| uDP4+ (H data)     | -       | -     | -     | -     |
| uDP4+ (C data)     | 99.99%  | 0.00% | 0.00% | 0.00% |
| uDP4+ (all data)   | 99.99%  | 0.00% | 0.00% | 0.00% |
| DP4+ (H data)      | -       | -     | -     | -     |
| DP4+ (C data)      | 100.00% | 0.00% | 0.00% | 0.00% |
| DP4+ (all data)    | 100.00% | 0.00% | 0.00% | 0.00% |

|   | 编号 | 实验    | No | RR_opt     | No | RS_opt     | No | SR_opt      | No | SS_opt     |
|---|----|-------|----|------------|----|------------|----|-------------|----|------------|
|   | 1  | 43.4  | 1  | 44.930375  | 1  | 50.821875  | 1  | 40.31920671 | 1  | 42.226475  |
|   | 2  | 22.5  | 2  | 24.811075  | 8  | 22.291575  | 8  | 23.39740916 | 8  | 31.908875  |
|   | 3  | 31.7  | 3  | 34.618975  | 9  | 34.991675  | 9  | 29.25018218 | 9  | 33.957275  |
| x | 4  | 144.1 | 4  | 151.954475 | 10 | 145.074275 | 10 | 146.0188392 | 10 | 151.112775 |
| x | 5  | 121.6 | 5  | 117.076275 | 11 | 128.129575 | 11 | 119.7140572 | 11 | 118.780775 |
|   | 6  | 87.4  | 6  | 86.273875  | 2  | 89.347275  | 2  | 89.52400628 | 2  | 87.884675  |
|   | 7  | 77.2  | 7  | 79.498775  | 3  | 83.175175  | 3  | 80.34566036 | 3  | 78.862975  |
|   | 8  | 37.0  | 8  | 37.870475  | 4  | 25.620175  | 4  | 29.83864934 | 4  | 32.746275  |
|   | 9  | 30.4  | 9  | 34.087075  | 5  | 34.735075  | 5  | 31.66463846 | 5  | 25.069275  |
|   | 10 | 30.8  | 10 | 33.137775  | 6  | 32.565675  | 6  | 33.65379836 | 6  | 37.987275  |
| x | 11 | 147.6 | 11 | 147.011675 | 12 | 144.114375 | 12 | 143.1393609 | 12 | 147.360875 |
| x | 12 | 171.0 | 12 | 167.340975 | 14 | 170.557275 | 14 | 168.8450661 | 14 | 167.695275 |
| x | 13 | 119.9 | 13 | 120.144375 | 13 | 116.965275 | 13 | 123.3069048 | 13 | 120.865775 |
|   | 14 | 19.8  | 14 | 21.112575  | 7  | 21.216275  | 7  | 21.22575536 | 7  | 21.858475  |
|   | 15 | 23.5  | 15 | 26.219275  | 15 | 25.486375  | 15 | 26.07918266 | 15 | 25.738375  |

**Figure S19.** Correlation coefficients and DP4+ analysis between experimental and calculated  $^{13}\text{C}$  NMR chemical shifts of isomer 1 =  $6R^*$ ,  $7R^*$ , isomer 2 =  $6R^*$ ,  $7S^*$ , isomer 3 =  $6S^*$ ,  $7R^*$ , and isomer 4 =  $6S^*$ ,  $7S^*$ .

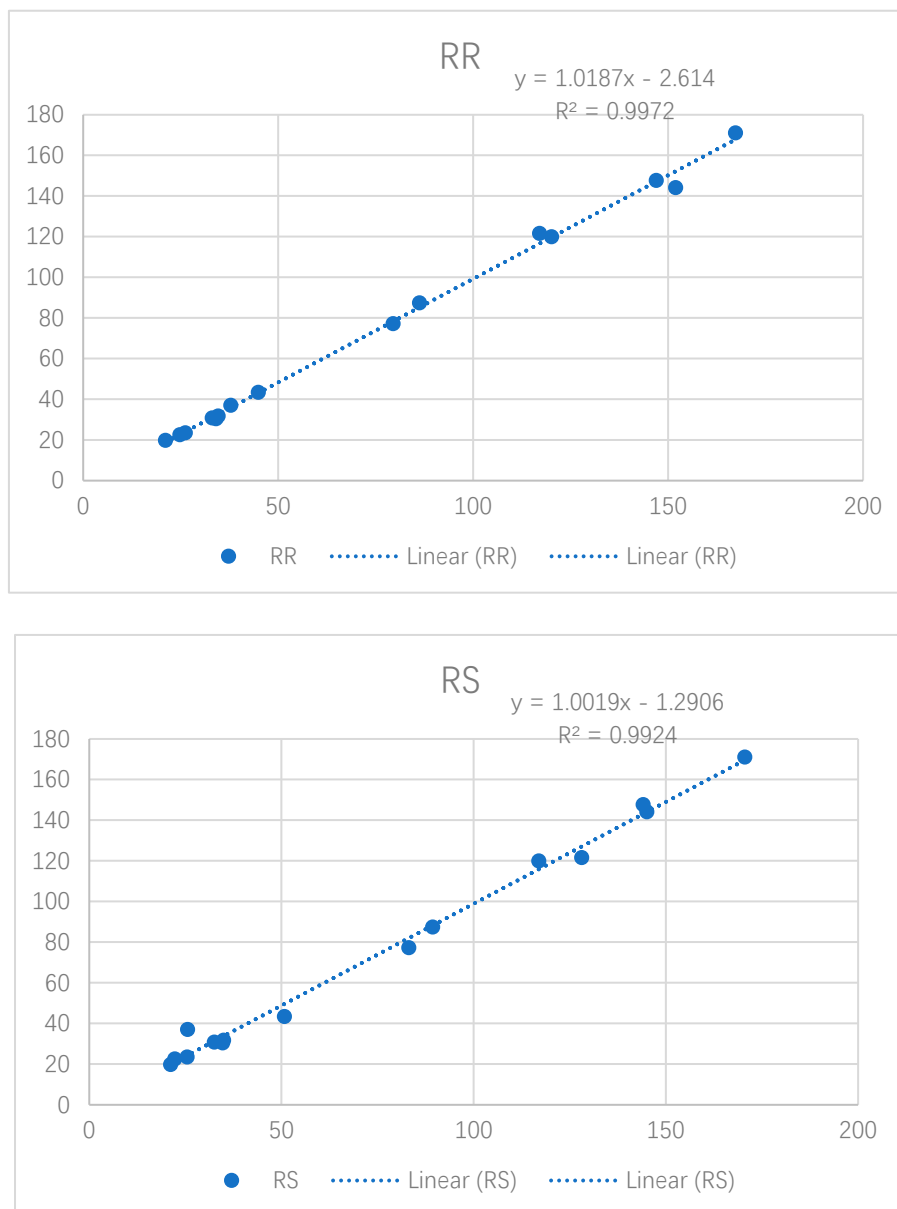

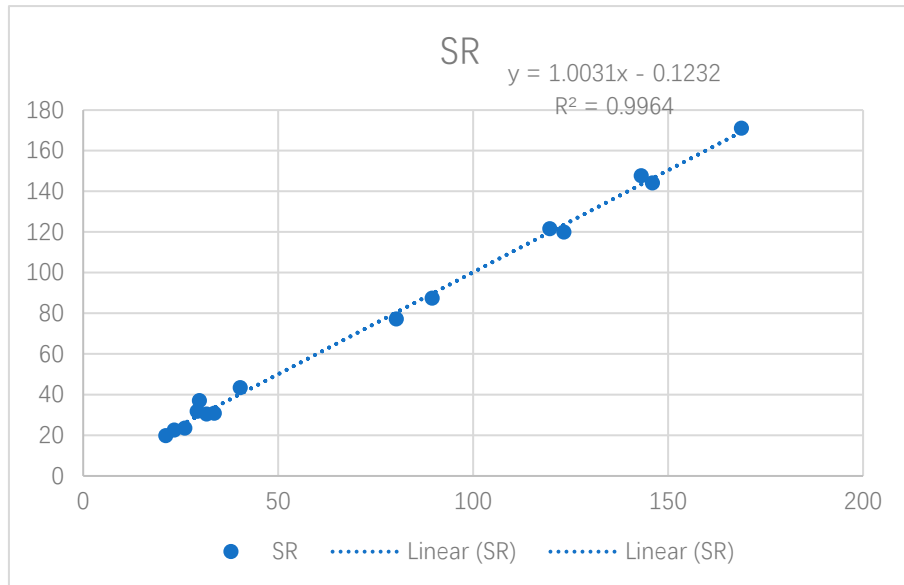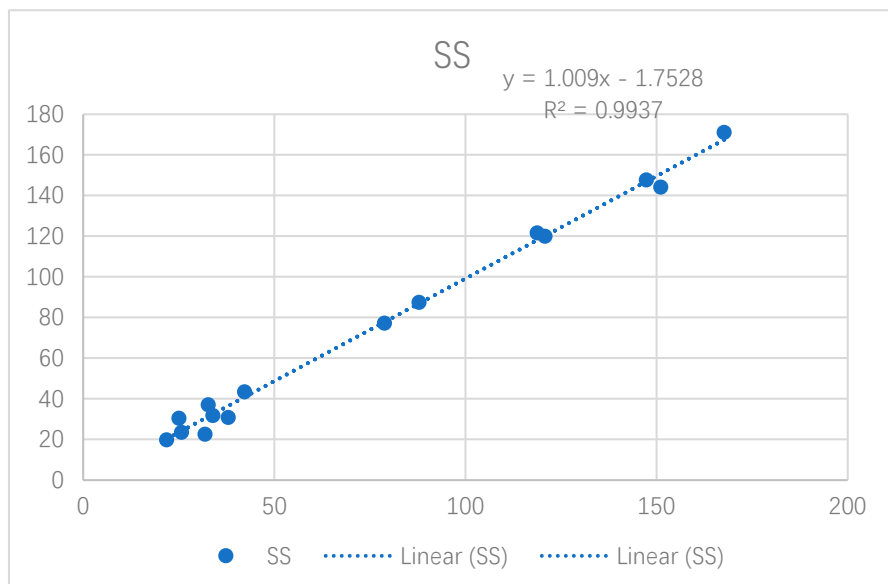

Supplement: s1 [file s1]
